# Supplementary material
Source: Springer Nature journal article supplement (https://www.springermedizin.de/resource/supplementary/12893_2010_196_MOESM3_ESM.pdf/9511766)
Supplement: MOESM3 [file 9511766]

# FOLLOW UP

1 yr

2 yr

3 yr

4 yr

5 yr

OCV  
CEA

abd US  
chest X-ray

coloscopy
